# Supplementary material for: Dispersive solid phase extraction of gold with magnetite-graphene oxide prior to its determination via microwave plasma-atomic emission spectrometry
Source: Royal Society of Chemistry journal article supplement (doi:10.1039/c6ra19845g), 2016-01-01
Supplement: c6ra19845g1.pdf [file c6ra19845g1.pdf]

Electronic supporting material

**Dispersive solid phase extraction of gold with magnetite-graphene oxide prior to their determination via Microwave Plasma–Atomic Emission Spectrometry**

Hilal Ahmad<sup>1</sup>, Aisha Abdul Jalil<sup>1 2\*</sup>, Sugeng Triwahyono<sup>3</sup>

*Centre of Hydrogen Energy, Institute of Future Energy, University Technology Malaysia, Malaysia.*

This Electronic Supplementary Information (ESI) file includes the supplementary figures and table.

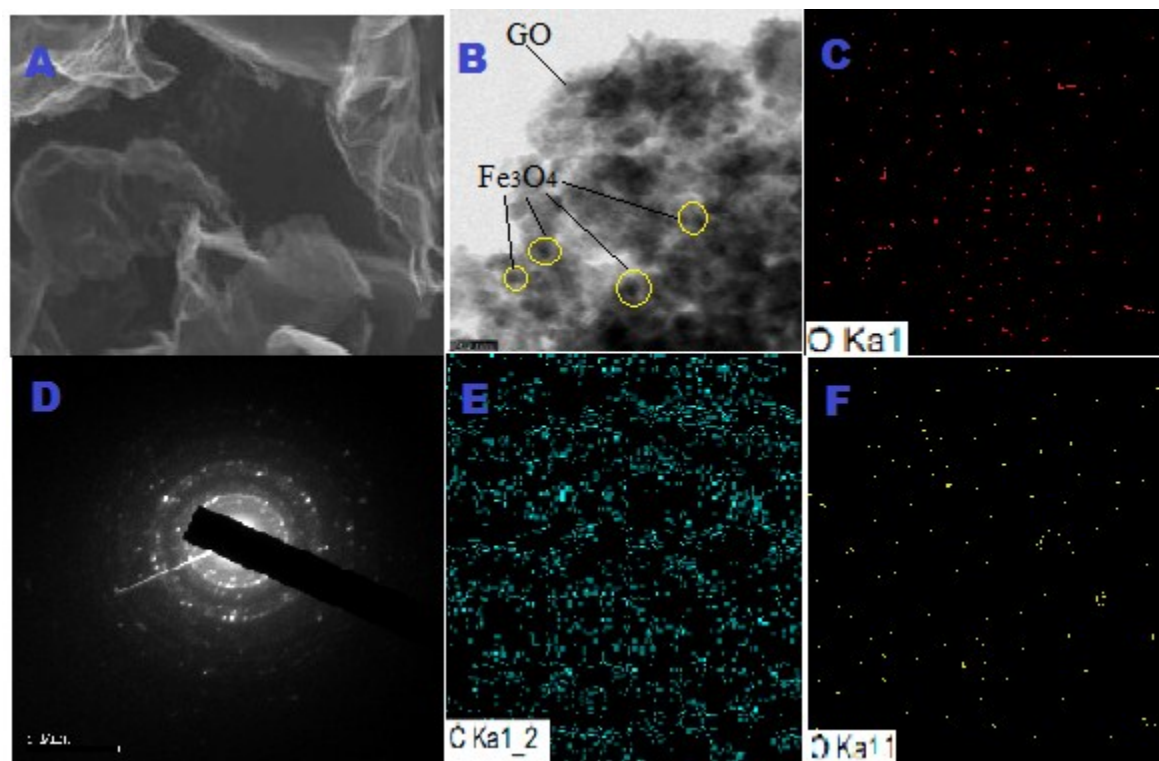

**Fig. ESM 1** (A) SEM image of m-GO, (B) TEM image of m-GO; (C,E,F) Elemental mapping images of carbon, oxygen and gold, respectively; (D) SAED pattern of m-GO.

<sup>1</sup> Center of Hydrogen Energy, Institute of Future Energy, Universiti Teknologi Malaysia, 81310 UTM Johor Bahru, Johor, Malaysia. E-mail: aishahaj@utm.my

<sup>2</sup> Department of Chemical Engineering, Faculty of Chemical and Energy Engineering, Universiti Teknologi Malaysia, 81310 UTM Johor Bahru, Johor, Malaysia.

<sup>3</sup> Department of Chemistry, Faculty of Science, Universiti Teknologi Malaysia, 81310 UTM Johor Bahru, Johor, Malaysia.

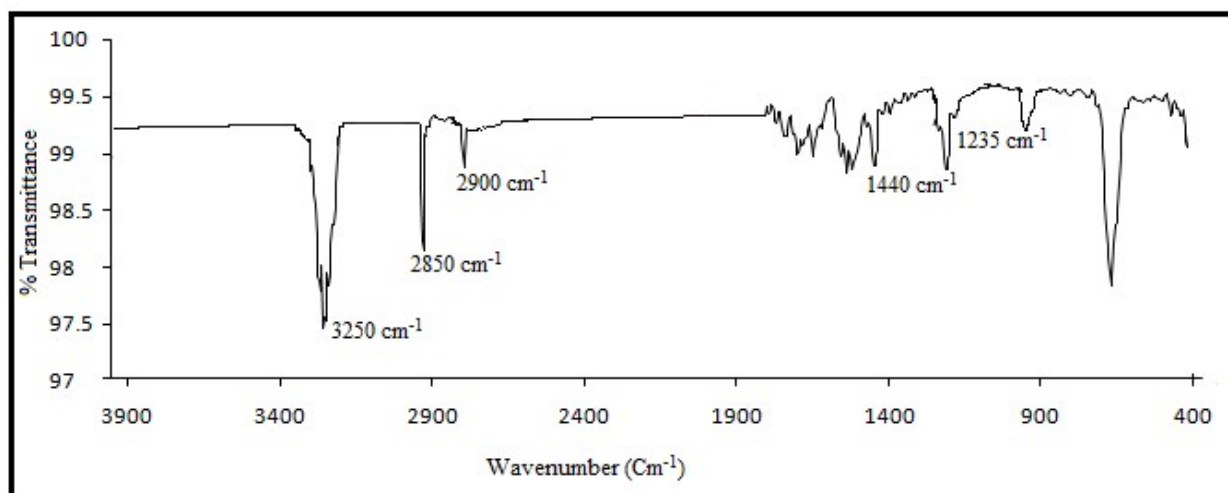

**Fig. ESM 2** FT-IR spectra of m-GO.

**ESM Table 1.** Effect of foreign ions on the recovery and determination of  $1.0 \mu\text{g L}^{-1}$  of Au using DSPE/MP-AES method.

| Foreign ions     | Added as                   | Amount added ( $\mu\text{g L}^{-1}$ ) | %Recovery | RSD (N=3) |
|------------------|----------------------------|---------------------------------------|-----------|-----------|
| $\text{Cu}^{2+}$ | $\text{CuNO}_3$            | 300                                   | 100.4     | 1.25      |
| $\text{Ni}^{2+}$ | $\text{NiNO}_3$            | 250                                   | 97        | 0.75      |
| $\text{Co}^{2+}$ | $\text{CoNO}_3$            | 500                                   | 96.3      | 1.42      |
| $\text{Cd}^{2+}$ | $\text{CdCl}_2$            | 500                                   | 98.5      | 0.43      |
| $\text{Zn}^{2+}$ | $\text{ZnCl}_2$            | 300                                   | 97.5      | 0.62      |
| $\text{Na}^+$    | $\text{NaCl}$              | 50000                                 | 98        | 1.71      |
| $\text{K}^+$     | $\text{KCl}$               | 40000                                 | 97.2      | 0.68      |
| $\text{Ca}^{2+}$ | $\text{CaCl}_2$            | 6000                                  | 101       | 0.87      |
| $\text{Mg}^{2+}$ | $\text{MgCl}_2$            | 10000                                 | 102       | 0.95      |
| $\text{Pd}^{2+}$ | $\text{Pd}(\text{NO}_3)_2$ | 250                                   | 102.2     | 0.67      |

---

|                               |                                  |       |       |      |
|-------------------------------|----------------------------------|-------|-------|------|
| Cr <sup>3+</sup>              | CrCl <sub>3</sub>                | 250   | 101   | 0.91 |
| CO <sub>3</sub> <sup>2-</sup> | Na <sub>2</sub> CO <sub>3</sub>  | 2000  | 102   | 1.1  |
| Br <sup>-</sup>               | NaBr                             | 75000 | 100   | 0.73 |
| Cl <sup>-</sup>               | NaCl                             | 75000 | 101.4 | 1.72 |
| NO <sub>3</sub> <sup>-</sup>  | NaNO <sub>3</sub>                | 3000  | 101.2 | 2.01 |
| PO <sub>4</sub> <sup>3-</sup> | Na <sub>2</sub> HPO <sub>4</sub> | 20000 | 98.8  | 2.43 |
| SO <sub>4</sub> <sup>2-</sup> | Na <sub>2</sub> SO <sub>4</sub>  | 22000 | 100.6 | 1.77 |

---
